# Supplementary material for: Emerging Antibiotic Resistance Patterns Affect Visual Outcome Treating Acute Endophthalmitis
Source: MDPI journal article supplement (doi:10.3390/antibiotics11070843), 2022-06-23
Supplement: s1 [file s1]

**Table S1.** Intraocular culture results.

| <b>Culture results</b>            | <b>Anterior Chamber, # (%)</b> | <b>Vitreous, # (%)</b> |
|-----------------------------------|--------------------------------|------------------------|
| Culture negative                  | 127 (78.4)                     | 129 (58.9)             |
| Staphylococcus Epidermidis        | 7 (4.32)                       | 25 (10.96)             |
| Streptococcus Mitis               | 4 (2.47)                       | 11 (5.02)              |
| Haemophilus Influenza             | 6 (3.7)                        | 8 (4.65)               |
| Pseudomonas Aeruginosa            | 4 (2.47)                       | 5 (2.28)               |
| Alpha-Haemolytic Streptococcus    | 0 (0)                          | 5 (2.28)               |
| Streptococcus Salivarius          | 1 (0.62)                       | 4 (1.83)               |
| Enterococcus Faecalis             | 1 (0.62)                       | 3 (1.37)               |
| Staphylococcus Aureus             | 2 (1.23)                       | 3 (1.37)               |
| Streptococcus Pneumoniae          | 1 (0.62)                       | 3 (1.37)               |
| Corynebacterium Tuberculostrictum | 0 (0)                          | 2 (0.91)               |
| Moraxella Nonliquefaciens         | 2 (1.23)                       | 2 (0.91)               |
| Staphylococcus Warneri            | 1 (0.62)                       | 2 (0.91)               |
| Sphingomonas Paucimobilis         | 1 (0.62)                       | 2 (0.91)               |
| Gram negative rods                | 0 (0)                          | 2 (0.91)               |
| Acinetobacter Iwoffii             | 2 (1.23)                       | 1 (0.46)               |
| Streptococcus Acidominimus        | 1 (0.62)                       | 1 (0.46)               |
| Achromobacter Xylosoxidans        | 0 (0)                          | 1 (0.46)               |
| Aeromonas Sobria                  | 0 (0)                          | 1 (0.46)               |
| Citrobacter Koseri                | 0 (0)                          | 1 (0.46)               |
| Enterococcus Cloacae              | 0 (0)                          | 1 (0.46)               |
| Gram positive cocci               | 0 (0)                          | 1 (0.46)               |
| Lactobacillus Paracasei           | 0 (0)                          | 1 (0.46)               |
| Listeria Monocytogenes            | 0 (0)                          | 1 (0.46)               |
| Neisseria Flavescens              | 0 (0)                          | 1 (0.46)               |
| Neisseria Meningitis              | 0 (0)                          | 1 (0.46)               |
| Staphylococcus Lugdunensis        | 0 (0)                          | 1 (0.46)               |
| Streptococcus Viridans            | 0 (0)                          | 1 (0.46)               |
| Stenotrophomonas Maltophilia      | 0 (0)                          | 1 (0.46)               |
| Gram positive rods                | 1 (0.62)                       | 0 (0)                  |
| Micrococcus Luteus                | 1 (0.62)                       | 0 (0)                  |
